# Supplementary material
Source: PubMed Central journal article supplement (PMC3487628)
Supplement: supp_me.2012-1222_me-12-1222_upplemental_FIG_1.pdf [file supp_me.2012-1222_me-12-1222_upplemental_FIG_1.pdf]

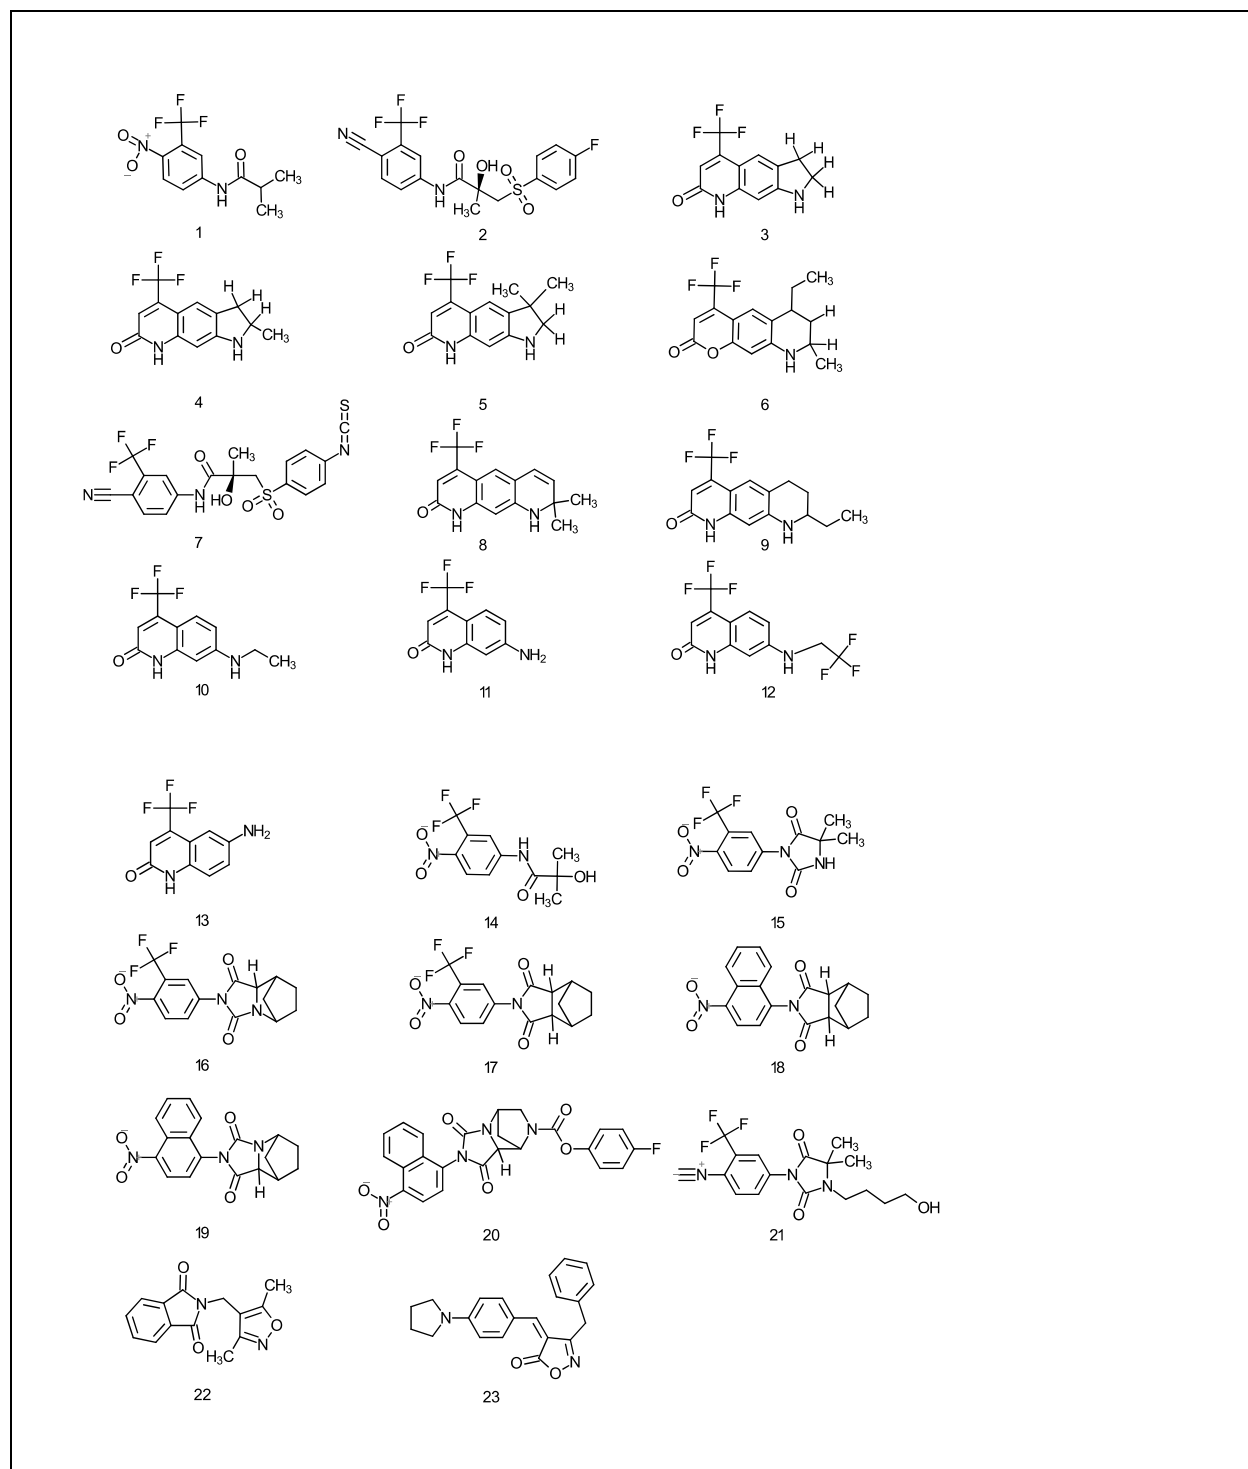

**Supplemental Figure 1.** Non-steroidal anti-androgens used for the active pharmacophoric fingerprint.

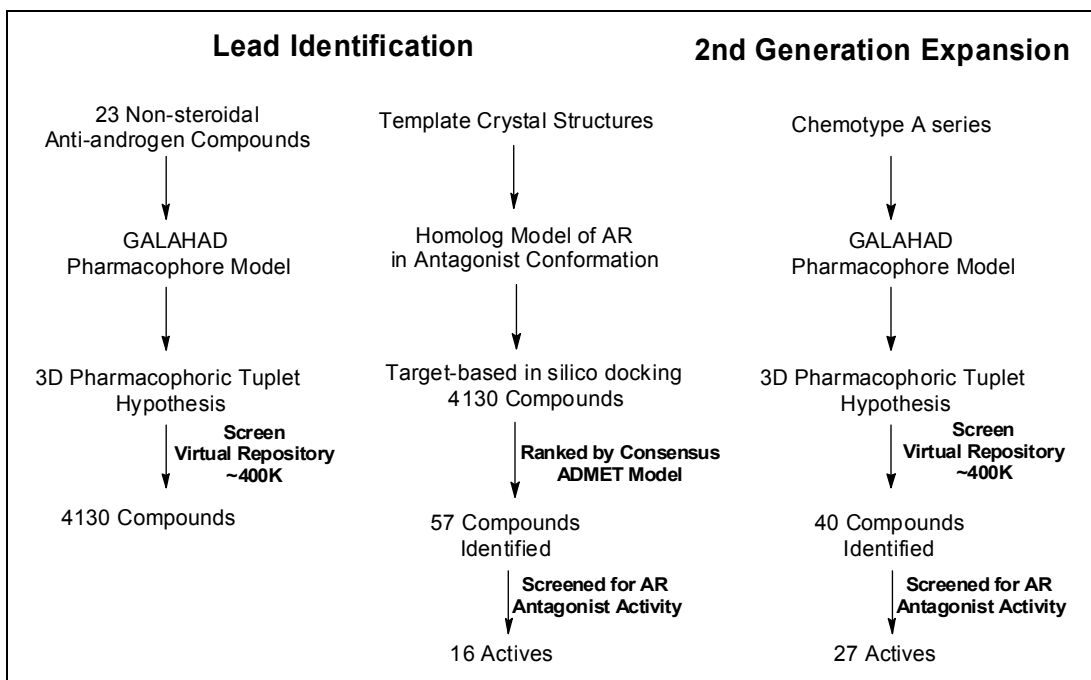

**Supplemental Figure 2.** Flow chart for *in silico* discovery of AR antagonists and lead expansion.

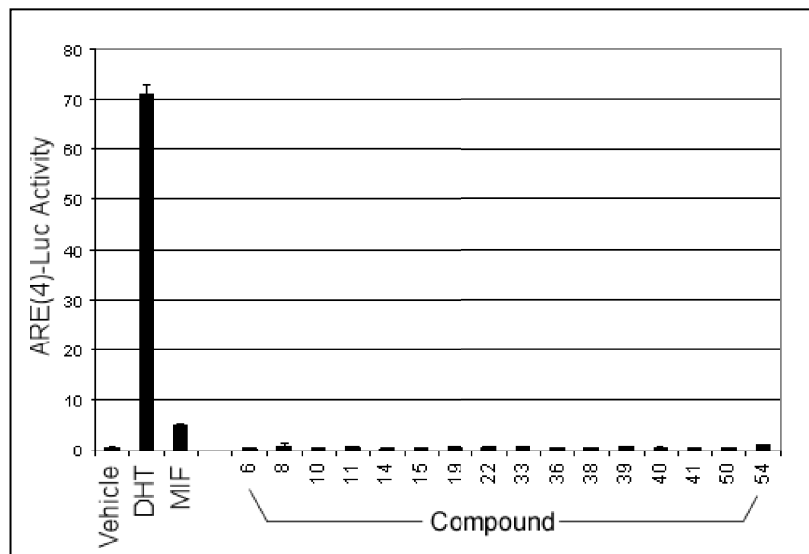

**Supplemental Figure 3.** AR antagonists in the absence DHT do not have agonist activity. Luciferase activity from COS7 cells transfected with AR and AR-responsive luciferase reporter plasmids followed by drug treatment with the indicated compounds for 24 hours. DHT (10 nM), Mifepristone (Mif, 100 nM), or the 16 selected compounds (50  $\mu$ M).

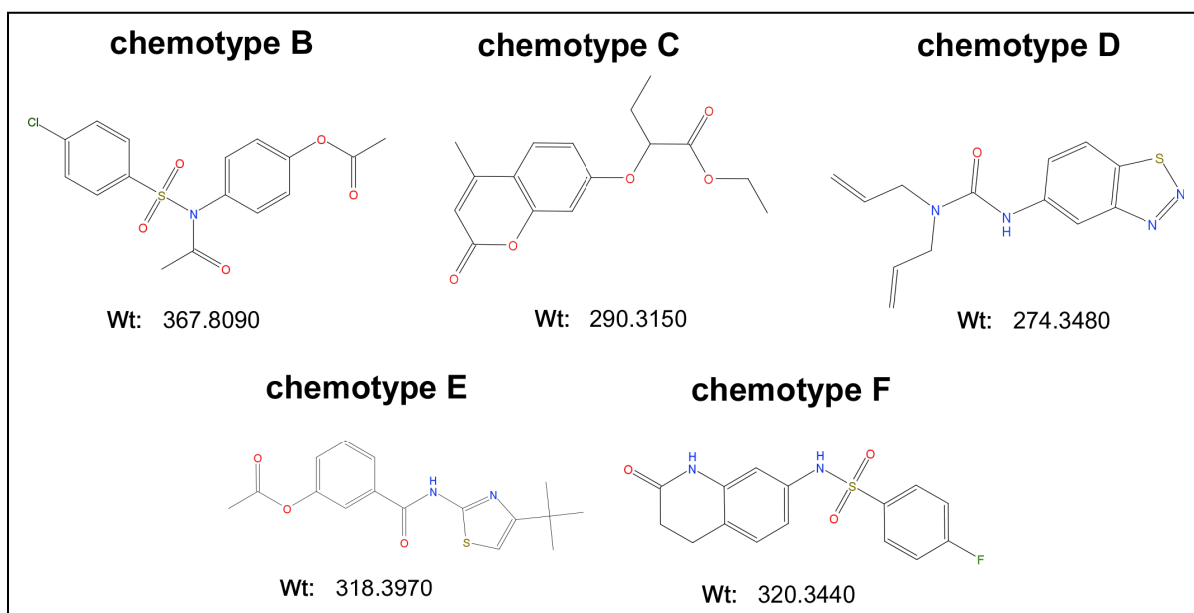

**Supplemental Figure 4.** Structures of chemotypes B-F AR antagonists.

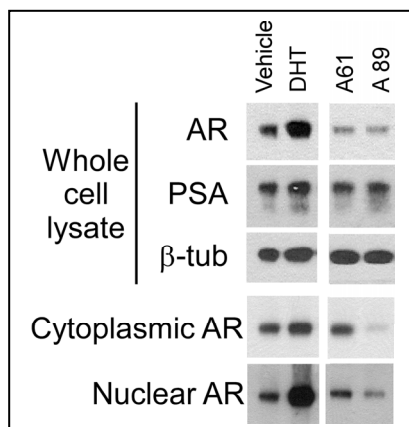

**Supplemental Figure 5.** Chemotype A compounds do not stimulate PSA synthesis or nuclear translocation of AR in C4-2 cells. C4-2 cells in steroid depleted medium (RPMI-1640 with 5% charcoal-dextran stripped serum) were stimulated for 4 hours with vehicle, 10 nM DHT, or 10 μM A61 or A81.

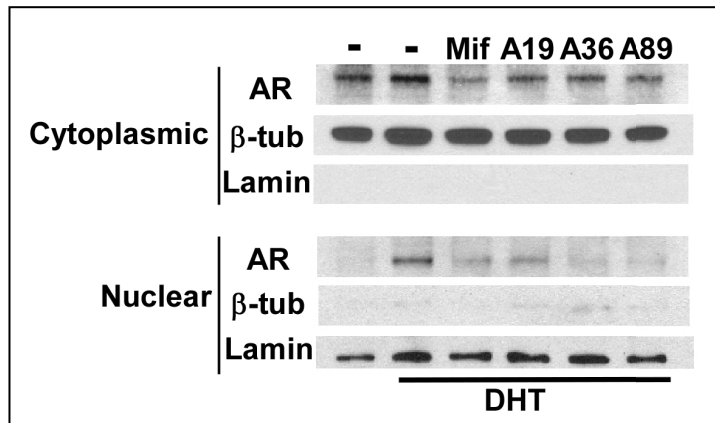

**Supplemental Figure 6.** Chemotype A compounds impair DHT stimulated nuclear localization of AR. C4-2 cells cultured for 3 days in steroid depleted medium (RPMI-1640 with 5% charcoal-dextran stripped serum) were treated as indicated for 24 hours with DHT (10 nM) and mifipristone (Mif) or chemotype A compounds (10  $\mu$ M). Equal amounts of total cytoplasmic or nuclear protein extracts were then immunoblotted as indicated.

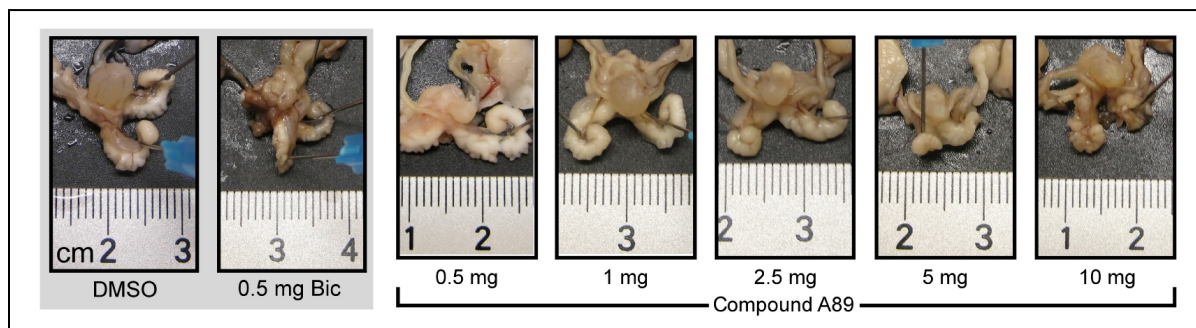

**Supplemental Figure 7.** AR antagonist activity of A89 *in vivo*. Male mice were treated with daily intraperitoneal injections of vehicle (DMSO), 0.5 mg bicalutamide (Bic), or A89 at 0.5, 1, 2.5, 5, or 10 mg. Mice were sacrificed after 7 days and seminal vesicle involution was assessed as a marker of AR antagonist activity.
